# Supplementary material for: Impact assessment of high soil CO2 on plant growth and soil environment: a greenhouse study
Source: PeerJ. 2019 Jan 25;7:e6311. doi: 10.7717/peerj.6311 (PMC6349027; doi:10.7717/peerj.6311)
Supplement: Supplemental Information 5 [file peerj-07-6311-s005.xlsx]

## Sheet: Sheet1
Soil		pH
	2018-08-21	2018-08-22	2018-08-23	2018-08-24	2018-08-25	2018-08-27	2018-08-28	2018-08-29	2018-08-30	2018-08-31	2018-09-01	2018-09-02	2018-09-03	2018-09-04	2018-09-05	2018-09-06	2018-09-07	2018-09-08	2018-09-09	2018-09-10	2018-09-11	2018-09-14	2018-09-15	2018-09-16	2018-09-17	2018-09-19	2018-09-20	2018-09-21	2018-09-22
BG1	6.5	6.32	6.09	6.83	7.22667	6.44667	7.22667	7.44	6.60333	7.4	6.79	7.42667	7.70333	7.12	7.21	7.20333	7.32	6.83333	7.25667	7.71	7.50333	8.33667	7.50333	8.22333	8.13333	8.40333	7.98667	7.97	7.90333
BG2	6.72	6.67	6.05	6.25667	6.74333	5.75	6.8	7.11	6.44	6.95	6.63333	6.78333	6.58	6.68667	6.41333	7.51	6.53333	6.73	6.74667	6.85667	7.34667	7.42333	7.34667	7.9	7.73	7.83	7.35	6.90667	7.60667
BG3	6.44	6.63	6.61	6.78	7.40667	6.98333	6.40667	7.15	7.39	7.29667	7.11667	7.64333	6.99667	7.25	7.13667	7.47	6.53333	6.76333	7.2	6.53667	7.85333	8.33667	7.85333	7.91	7.82667	7.64	7.97	7.73	7.56333
BG4	5.97	6.3	6.23	6.67333	6.82667	6.99667	6.46	7.28667	7.65333	7.45	7.54	7.46	7.91	7.52667	7.28	7.67	7.12333	7.27333	7.5	6.88	7.70667	7.92333	7.70667	8.37667	8.2	8.26	7.85	8.3	7.62
BG5	5.91	6.35	6.64	6.80667	7.14667	7.15333	6.57667	7.53667	7.26667	7.69	7.71	7.68333	7.72667	7.57333	7.86333	7.6	7.31	7.16333	7.55333	6.83	7.81	8.3	7.81	8.16667	7.94	8.3	8.05	8.48	8.12
BG6	5.02	6.24	6.72	7.11333	7.17667	7.05333	6.63333	7.46333	6.88333	7.77667	7.85333	7.45333	7.73333	7.51	7.96	7.87	7.33333	7.04333	7.53333	6.94333	7.92	8.28	7.92	8.23	8.6	8.35667	7.83333	8.36333	8.04333
BG7	5.11	6.63	6.63	7.23	6.66	7.18667	6.45667	6.70333	7.64	7.31667	7.43	7.52667	7.73333	7.68667	7.43333	7.69667	7.34333	7.18333	7.83667	7.13	7.73333	8.06667	7.73333	8.18	8.39	8.55333	7.58667	8.23	7.87667
BG8	5.08	6.03	6.55	6.63667	6.68333	6.66333	6.12333	6.89	7.00667	7.37333	6.96	7.49667	7.58667	7.19	7.04	7.58667	7.23667	6.78	7.42333	7.07	7.57333	7.70667	7.57333	7.91667	7.63667	8.31667	7.58667	8.09	7.78
BG9	5.14	6.17	6.45	6.71667	6.52333	6.42667	6.09	7.13333	7.08	7.18667	6.87667	6.95333	7.27667	7.08	7.1	7.40667	6.83333	6.90667	6.62333	6.99	7.56667	7.88333	7.56667	7.79667	7.67	7.96667	7.66667	8.05	7.57333
NG1	6.59	6.25	6.6	6.84	6.82667	7.44667	6.38667	7.29333	7.27	7.53667	7.61667	7.87	7.59	7.49667	7.57	8.12333	7.74667	7.59	7.9	7.26667	7.86	8.30667	7.86	8.51333	7.98667	8.57667	7.87667	8.04	8.18667
NG2	6.7	6.65	6.75	6.74667	6.95	7.45667	6.44667	7.31667	7.31667	7.53	7.49667	7.57333	5.70333	7.70333	7.72333	7.75333	7.65667	7.78667	7.64667	7.56333	7.84333	8.41333	7.84333	7.71667	7.93667	8.36667	8.06333	8.24	8.32
NG3	6.58	6.27	6.76	6.82333	7.16333	7.48667	6.57333	7.22333	7.26333	7.49667	7.45	7.43333	5.66333	7.55667	7.34667	7.84667	7.97	7.55	7.43	7.50667	7.76333	8.14333	7.76333	7.70333	7.98	8.43667	8.10667	7.97667	8.38333
NG4	6.86	6.85	6.45	7.35667	7.13667	7.55667	6.29	7.66	7.28667	7.50667	7.45667	7.32333	7.73333	8.22333	7.48	8.38333	8.23667	7.6	7.74333	7.53333	8.02667	8.26667	8.02667	8.32333	8.37333	8.41333	8.19	8.41667	8.24333
NG5	6.68	6.82	6.32	7.03333	7.17667	6.90333	6.46333	7.44	7.12667	6.66667	7.06	6.92	7.04	7.71	7.41667	7.77	7.65	6.94667	6.64333	7.52333	7.83333	7.99333	7.83333	8.38	8.40333	8.37667	8.22	5.65333	7.97
NG6	6.44	6.97	6.85	6.69333	8.07667	7.48	6.28667	7.38333	7.24	7.83667	7.72	7.32667	7.55	7.68667	7.62667	7.76333	7.81667	7.14	6.63	7.55	7.96667	7.90667	7.96667	7.85333	8.57333	8.54333	8.3	8.19333	7.85
NG7	6.39	6.86	6.76	6.60333	7.18333	7.26	6.23333	7.29333	7.45667	7.49	7.64667	7.32333	7.48333	8.19333	7.23333	7.71333	7.95667	7.51667	7.23667	7.51	7.95667	7.73333	7.95667	7.83333	8.49333	8.41333	8.23333	8.25	8.01
NG8	6.69	7.02	6.7	6.47333	6.88333	6.97	6.50667	6.83	6.87333	7.11	7.31667	7.33	6.97	7.13667	7.21333	7.49	7.21667	7.06	7.04333	7.40333	7.61333	7.86667	7.63	8.01333	8.08333	7.86333	8.11667	8.05333	7.54667
NG9	6.83	6.79	6.68	6.74667	6.36	7.06333	6.62333	6.89667	6.98333	7.03	7.03	7.14333	7.14	7.68333	7.46667	7.23	7.18333	7	7.09667	7.01667	7.5	7.62	7.5	8.38333	8.33667	8.14	8.20333	7.64333	7.85667
CG1	6.04	6.22	6.4	6.24	6.55667	6.15	6.36	6.56667	6.52667	6.75667	6.82333	6.77	6.90333	6.62333	6.72	6.83333	6.87333	7.13	6.69333	6.86	6.92667	7.04667	6.92667	7.26	7.74	7.82	7.82667	7.26333	7.39333
CG2	6.27	6.05	6.59	6.31333	6.72667	6.63	6.51	6.74	6.57667	7	6.66667	6.93333	7.91667	6.92333	6.80667	6.96	6.91	6.77333	6.82667	6.8	7.20667	7.34667	7.20667	7.34667	7.60333	7.53	7.62667	7.48	7.39
CG3	6.25	6.08	6.42	6.36333	6.45	6.36667	6.19	6.78	6.56333	6.99333	6.75667	6.83667	6.84667	6.84	6.82	6.98	6.95333	6.93667	6.86667	7.03667	7.05	7.27667	7.05	7.39333	7.52333	7.58333	7.63667	7.49333	7.52
CG4	6.23	5.98	6.57	6.51667	6.7	6.52333	6.42	6.68667	6.67333	6.79333	6.73667	6.84333	6.90333	6.94667	6.77	6.99667	6.82667	6.68333	6.83333	7.01	7.10667	7.22333	7.10667	7.40667	7.58333	7.58667	7.69667	7.60333	7.6
CG5	6.22	5.82	6.04	6.38667	6.72333	6.45333	6.47667	6.62333	6.67333	7.14	7.48333	7.36	7.35333	7.48	7.17333	7.36667	7.2	7.02	7.11	7.28	7.29667	7.82667	7.29667	7.56667	7.51333	7.81333	7.75667	7.69	5.35
CG6	5.06	5.4	6.78	5.93	6.46667	6.05333	5.91333	6.32	6.69333	6.56	6.27	6.43333	6.18667	6.48333	6.81667	6.63667	6.53667	6.75	6.50333	6.76667	6.59667	7	6.34667	7.32333	7.27667	7.53	7.8	7.48333	7.45
CG7	6.28	6.78	6.36	6.63667	7.18333	7.05667	6.5	6.68333	6.50667	7.24333	6.94	6.85	6.93333	6.93667	6.77667	6.97667	6.81667	6.91	7.56667	7.02667	7.48	7.5	7.48	7.12667	7.38	7.76667	7.77333	7.35	7.19333
CG8	6.4	6.22	6.35	6.40333	6.46667	6.53	6.18	6.57	6.82333	7.04333	6.80667	6.89	6.95667	6.95667	7.23333	7.32	7.09333	7.15667	7.31667	7.38333	7.63667	7.73333	7.63667	7.69333	7.82333	7.97667	7.83333	7.85	7.73667
CG9	6.24	5.81	7.05	6.35333	6.93667	6.97	6.70667	6.9	7.03667	7.74	7.5	7.26667	7.50667	7.24667	7.61333	7.30333	7.14667	7.16	7.41667	7.43333	7.51	7.65	7.51	7.89667	7.96667	8.04333	7.72	7.89333	7.91333
